# Supplementary material
Source: Royal Society of Chemistry journal article supplement (doi:10.1039/d6ma00194g)
Supplement: d6ma00194g1.pdf [file d6ma00194g1.pdf]

## Supporting Information

# Tunable Optical Responses in a Cyanoester-Based Organic $\pi$ -Conjugates for Selective Sensing of Aliphatic Diamine Vapors

*Akshita Jain, Syed Noushin, Pralok K Samanta, and Manab Chakravarty\**

Department of Chemistry, Birla Institute of Technology and Sciences-Pilani, Hyderabad Campus,  
Jawaharnagar, Medak, Shamirpet, Hyderabad-500078

| S.No | Contents                                                                                                                    | Page No. |
|------|-----------------------------------------------------------------------------------------------------------------------------|----------|
| 1    | Absorption and Emission spectra of <b>CYE</b> (Figure S1)                                                                   | 2        |
| 2    | Absorbance and Emission wavelength of Solvatochromic studies for <b>CYE</b> (Table S1)                                      | 2        |
| 3    | DFT Optimised structures of <b>CYE</b> (Figure S2)                                                                          | 2        |
| 4    | AIE study: Absorption spectra of <b>CYE</b> and DLS study (Figure S3)                                                       | 3        |
| 5    | Absorbance and emission wavelength of AIE studies for <b>CYE</b> (Table S2)                                                 | 3        |
| 6    | Solid state UV-vis and Emission spectra of probes <b>CYE</b> (Figure S4)                                                    | 3        |
| 7    | Absorption spectra of <b>CYE</b> in solution and aggregated state( Figure S5)                                               | 4        |
| 8    | Solid-state emission profile of <b>CYE</b> before and after exposure to amine vapors( Figure S6)                            | 4        |
| 9    | Study of <b>CYE</b> with interfering substances (Figure S7)                                                                 | 4        |
| 10   | Solid state (a) UV-Vis and (b) Emission spectra of <b>CYE</b> under different concentrations of PUT (Figure S8)             | 4        |
| 11   | Solid state emission spectra of <b>CYA</b> with amines (Figure S9, Table S3)                                                | 4-6      |
| 12   | Solid state UV-vis spectra of <b>CYE</b> and <b>CYA</b> with amines (Figure S10)                                            | 6        |
| 13   | <sup>1</sup> H NMR Spectra(Aliphatic region) of <b>CYE</b> and fumed <b>CYE</b> with 1,4-DAB (Figure S11)                   | 7        |
| 14   | LCMS spectra of fumed <b>CYE</b> and <b>CYA</b> (Figure S12-S14)                                                            | 7-8      |
| 15   | Lifetime decay plot of <b>CYE</b> and <b>CYA</b> with their details (Figure S15, Table S4)                                  | 8        |
| 16   | PXRD pattern of <b>CYE</b> and <b>CYA</b> (Figure S16)                                                                      | 9        |
| 17   | SEM images of <b>CYE</b> and <b>CYA</b> (Figure S17)                                                                        | 10       |
| 18   | Photostability study of <b>CYE</b> and <b>CYA</b> (Figure S18)                                                              | 10       |
| 19   | Theoretical studies(Table S5)                                                                                               | 10-11    |
| 20   | Emission spectra of (a) <b>CYE</b> (b) <b>CYA</b> after exposing to cottage-cheese at different time intervals (Figure S19) | 11       |
| 21   | <sup>1</sup> H NMR, <sup>13</sup> C NMR, HRMS of <b>DAA</b> , <b>CYE</b> and <b>CYA</b> (Figure S20-S28)                    | 12-16    |



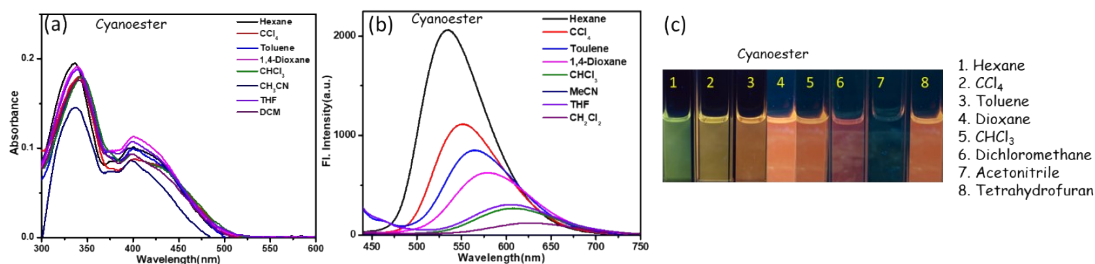

**Figure S1:** (a) absorption and (b) emission spectra of **CYE** (c) Photographs taken under 365 nm UV-vis lamp.  $\lambda_{\text{ex}} = 398$  nm.

**Table S1:** Absorbance and Emission wavelength of Solvatochromic studies for **CYE**

| Solvents                        | Cyanoester<br>[ $\lambda_{\text{abs/em}}$ (nm)] | $\Phi_f$ (%) |
|---------------------------------|-------------------------------------------------|--------------|
| Hexane                          | 340, 399/535                                    | 12.4         |
| CCl <sub>4</sub>                | 340, 399/550                                    | 10.8         |
| Toluene                         | 340, 399/565                                    | 8.9          |
| 1,4-Dioxane                     | 340, 399/579                                    | 7.5          |
| THF                             | 340, 399/606                                    | 3            |
| CHCl <sub>3</sub>               | 340, 399/607                                    | 5            |
| CH <sub>2</sub> Cl <sub>2</sub> | 340, 399/626                                    | 2            |
| MeCN                            | 340, 399/NE                                     | NE           |

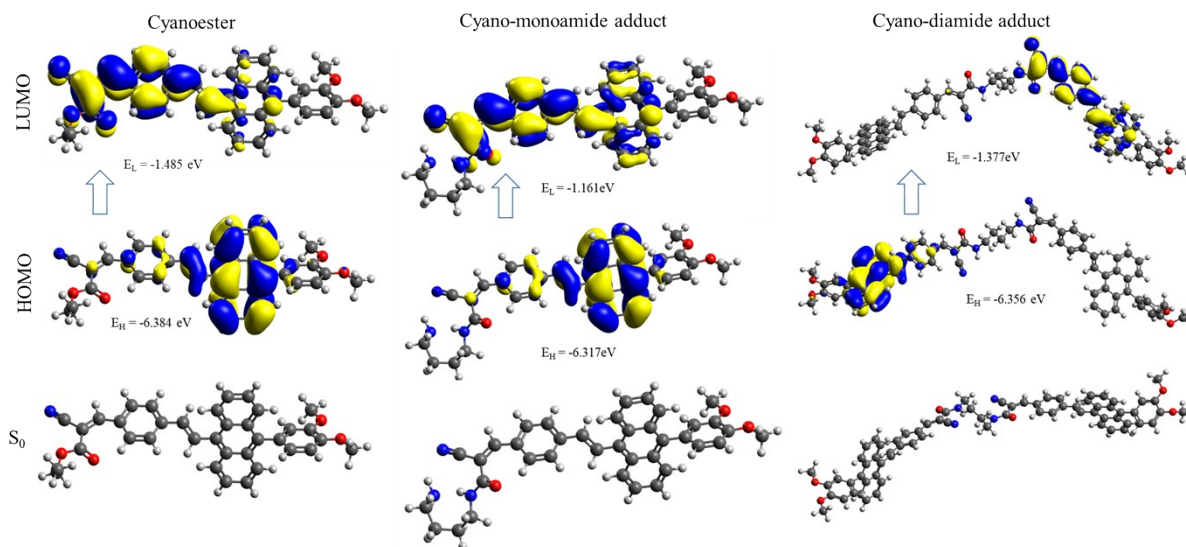

**Figure S2:** Frontier Molecular Orbital (FMO) contributions of **CYE** using CAM-B3LYP/6-31G(d) level of theory

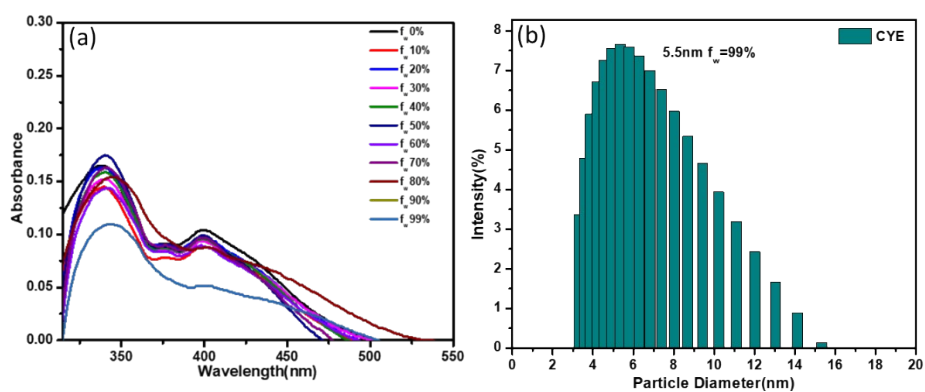

**Figure S3:** AIE study: (a) Absorption spectra of **CYE** (b) DLS study of **CYE**

**Table S2:** Absorbance and emission wavelength of AIE studies for **CYE**

| $f_w(v/v)(\%)$ | Cyanoester<br>[ $\lambda_{abs/em}(nm)$ ] |
|----------------|------------------------------------------|
| 0              | 340,399/NE                               |
| 10             | 340,399/492                              |
| 20             | 340,399/492                              |
| 30             | 340,399/492                              |
| 40             | 340,399/500                              |
| 50             | 340,399/500                              |
| 60             | 340,399/500                              |
| 70             | 340,399/502                              |
| 80             | 344,399/612                              |
| 90             | 340,399/605                              |
| 99             | <b>343,399/597</b>                       |

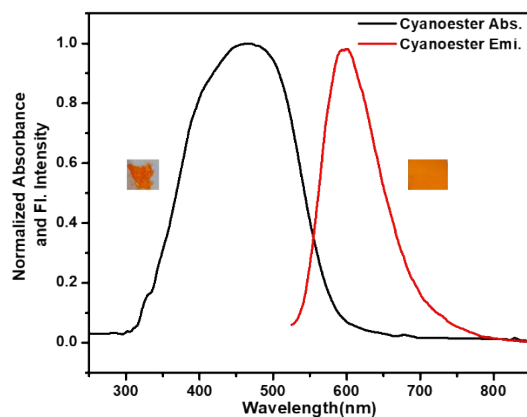

**Figure S4:** Solid-state UV-vis and Emission spectra of probes **CYE**.  $\lambda_{ex} = 398$

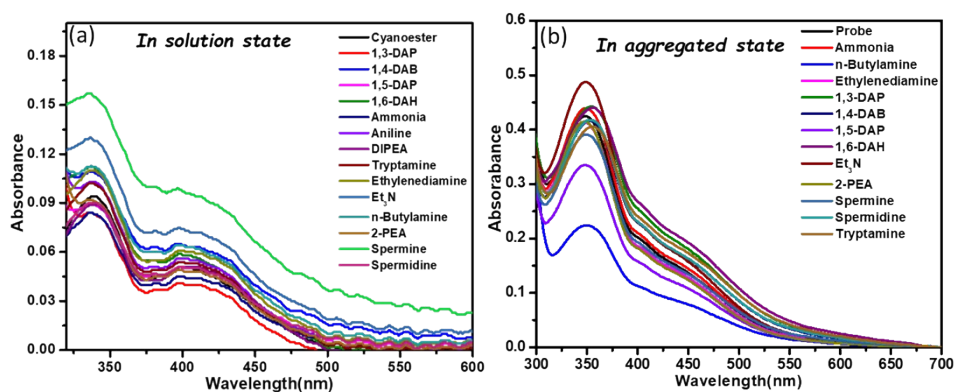

**Figure S5:** Absorption spectra of **CYE** in (a) solution state (10  $\mu\text{M}$  in dioxane) (b) aggregated state after adding amines (100  $\mu\text{M}$  in DMAc).

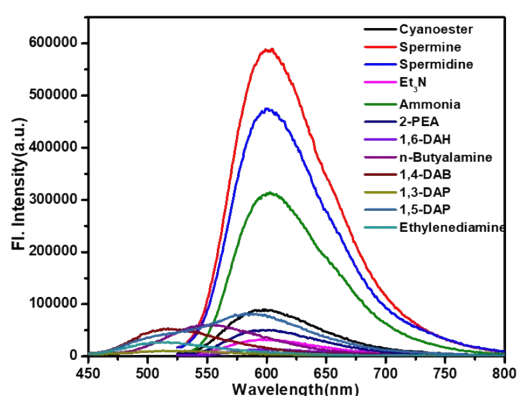

**Figure S6:** Solid-state emission profile of **CYE** before and after exposure to amine vapors.  $\lambda_{\text{ex}} = 450,525 \text{ nm}$ .

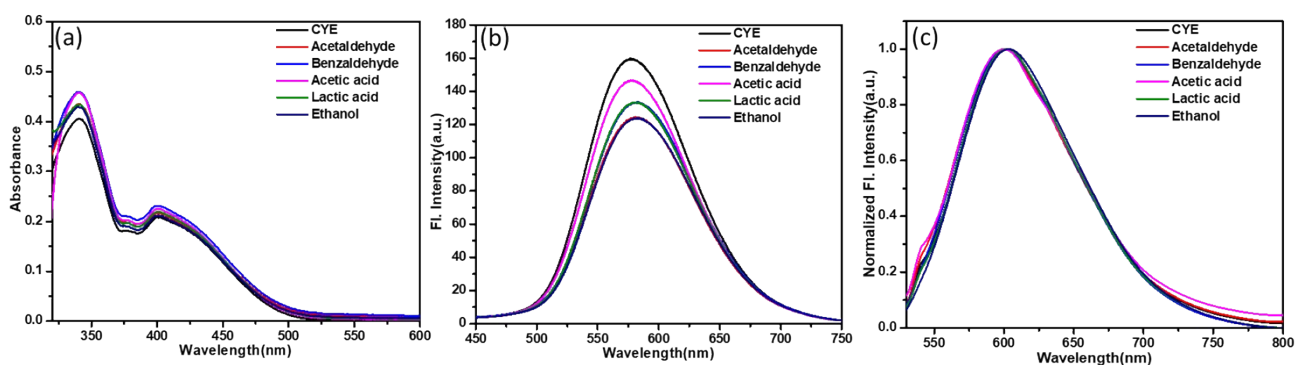

**Figure S7:** Solution state (10  $\mu\text{M}$  in 1,4-dioxane) (a) Absorption spectra (b) Emission spectra (c) Solid-state emission spectra of **CYE** with interfering substances (exposed for 20 minutes,

the experiment was .  $\lambda_{ex} = 400$  nm. The experiments were performed following the same procedure, used for other comparative studies.

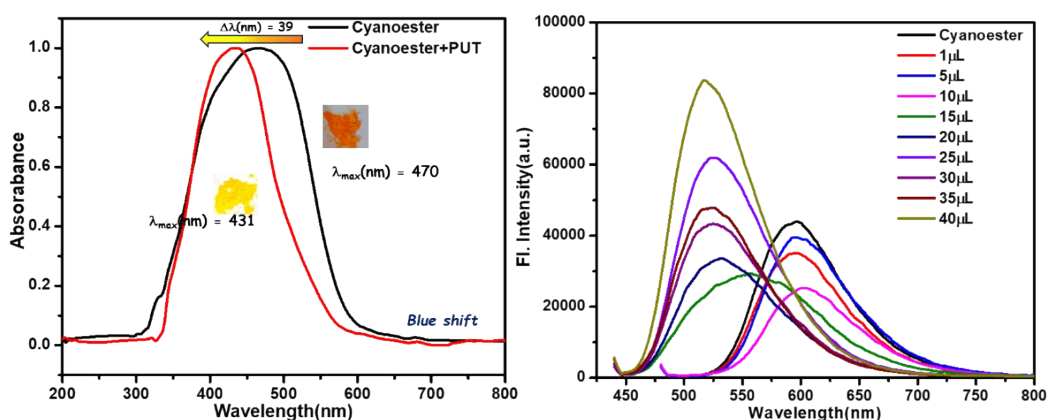

**Figure S8:** Solid-state (a) UV-Vis and (b) Emission spectra of **CYE** under different concentrations of **PUT**  $\lambda_{ex} = 440,480$  nm

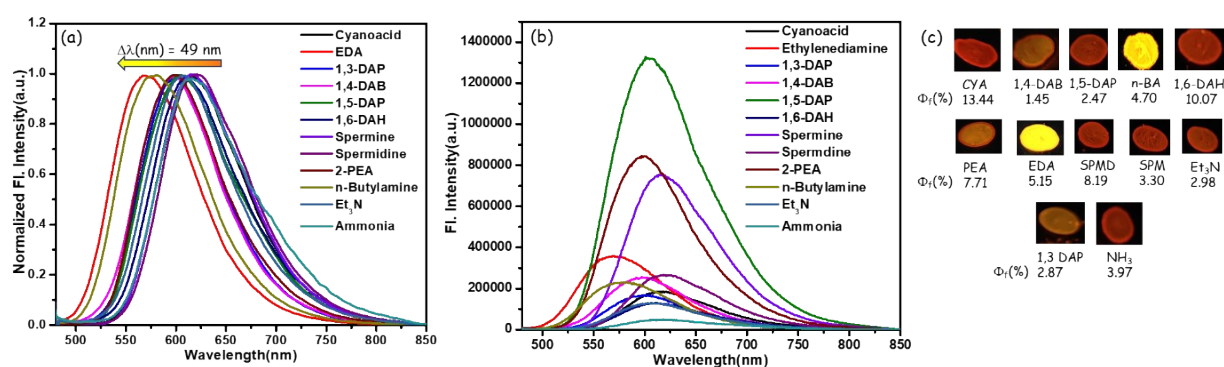

**Figure S9:** (a,b) Details of the solid-state emission profile of **CYA** with various amines. (c) Photographs of the coverslip are taken under a 365 nm UV lamp.  $\lambda_{ex} = 398$  nm

**Table S3:** Details of solid-state emission profile of **CYA** with various amines. 30  $\mu$ L of a 10 mM solution of **CYA** in 1,4-dioxane was drop-cast onto a glass coverslip and allowed to dry. The dried cover slips were exposed to 30  $\mu$ L of amine vapors in a 200 mL air-tight bottle.

$\lambda_{ex}=400$  nm

| Amines | Cyanoacid           |                      |              |                      |
|--------|---------------------|----------------------|--------------|----------------------|
| Amines | $\lambda_{em}$ (nm) | $\Delta\lambda$ (nm) | $\Phi_f$ (%) | Concentration (mg/L) |
| Probe  | 618                 | -                    | 13.44        | -                    |

|                 |     |    |       |        |
|-----------------|-----|----|-------|--------|
| 1,3-DAP         | 600 | 18 | 2.87  | 133.2  |
| 1,4-DAB         | 596 | 22 | 1.45  | 131.55 |
| 1,5-DAP         | 604 | 14 | 2.47  | 130.5  |
| 1,6-DAH         | 612 | 6  | 10.07 | 126    |
| Ethylenediamine | 569 | 49 | 5.15  | 135    |
| Spermidine      | 618 | 0  | 8.19  | 138.7  |
| Spermine        | 618 | 0  | 3.30  | 140.5  |
| N-Butylamine    | 580 | 38 | 4.70  | 111    |
| Ammonia         | 618 | 0  | 3.97  | 109.5  |
| Triethylamine   | 608 | 0  | 2.98  | 108.9  |
| PEA             | 598 | 20 | 7.71  | 144.6  |

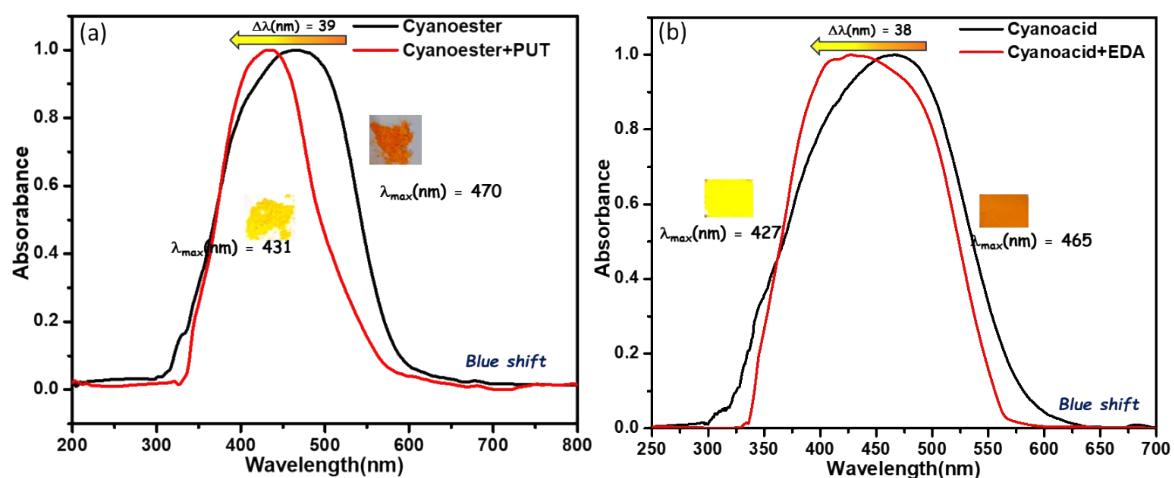

**Figure S10:** Solid state UV-Vis Spectra of (a) CYE and fumed CYE with 1,4-DAB (b) CYA and fumed CYA with EDA

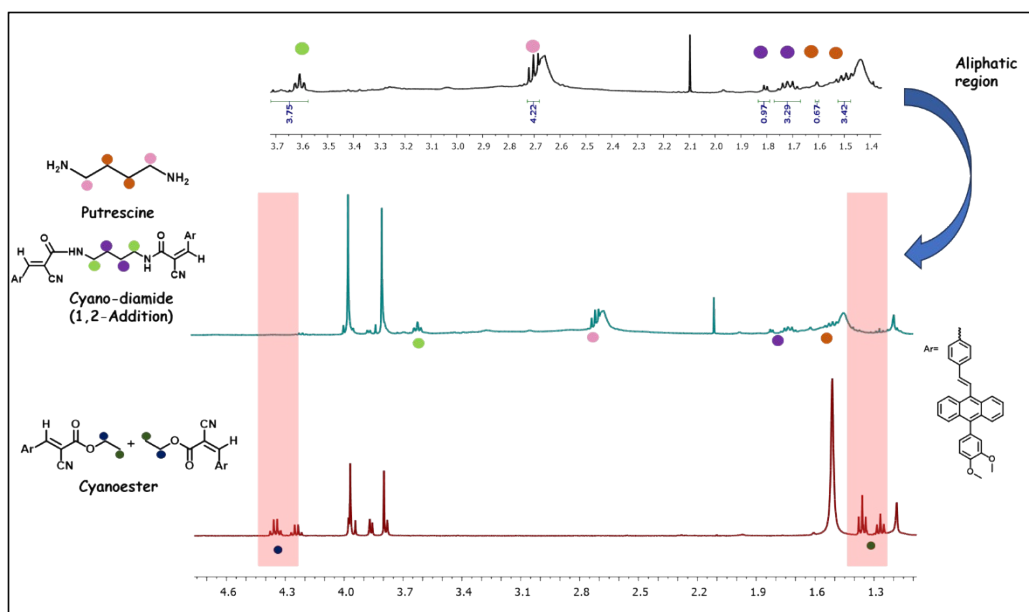

**Figure S11:**  $^1\text{H}$  NMR Spectra(Aliphatic region) of CYE and fumed CYE with 1,4-DAB

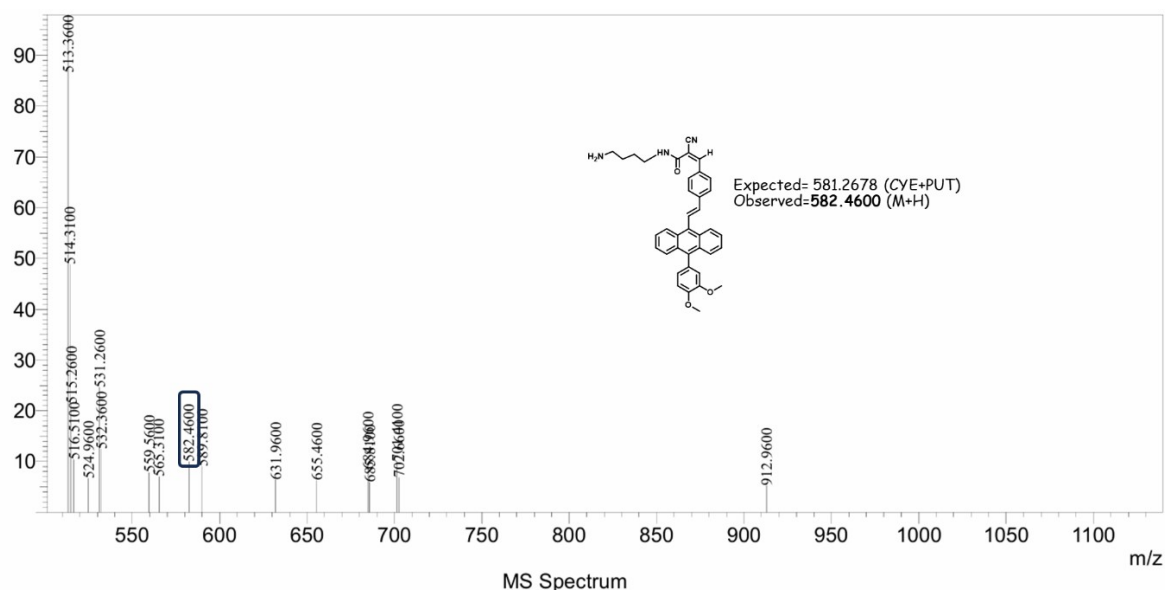

**Figure S12:** LC-MS spectra of fumed CYE with PUT/1,4-DAB(cyano-monoamide)

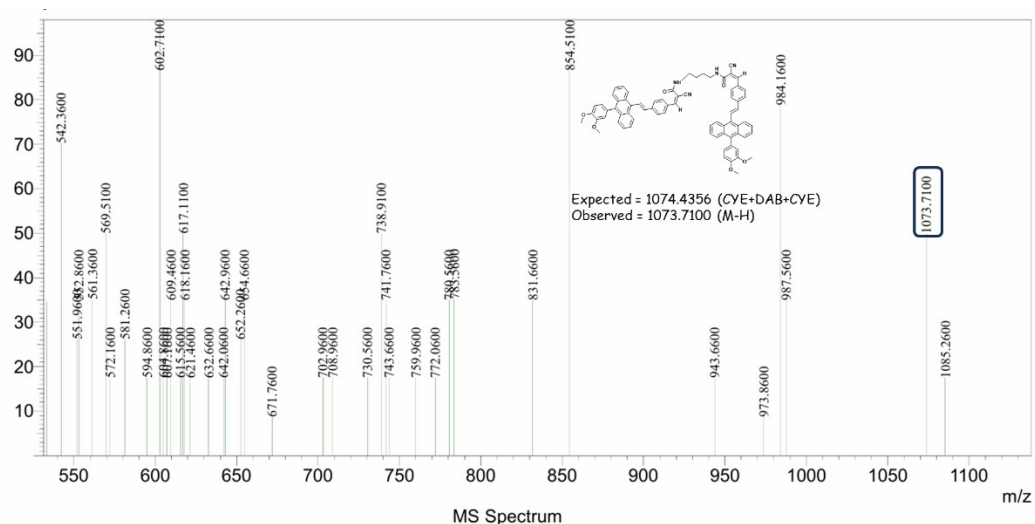

**Figure S13:** LC-MS spectra of fumed CYE with 1,4-DAB(cyano-diamide)

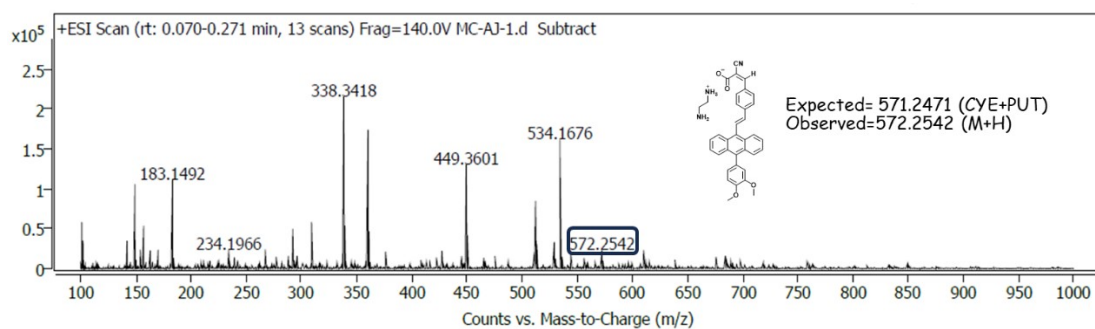

**Figure S14:** HR-MS spectra of fumed CYA with EDA (salt formation)

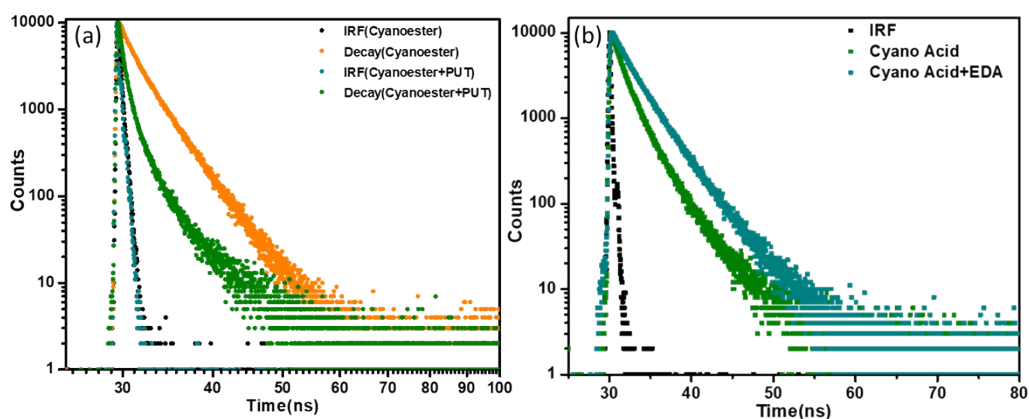

**Figure S15:** Lifetime decay plot of (a) fumed CYE with PUT (b) fumed CYA with EDA

**Table S4:** Lifetime components; All lifetimes ( $\tau$ ) are in ns, and  $\lambda_{ex} = 440, 510$  nm

| Sample           | $\tau_1$ | $\tau_2$ | $\tau_3$ | $\alpha_1$ | $\alpha_2$ | $\alpha_3$ | $\langle\tau\rangle$ | $\chi^2$ | $\Phi_f\%$ | $K_r$<br>( $\times 10^6 \text{ s}^{-1}$ ) | $K_{nr}$<br>( $\times 10^6 \text{ s}^{-1}$ ) |
|------------------|----------|----------|----------|------------|------------|------------|----------------------|----------|------------|-------------------------------------------|----------------------------------------------|
| Cyanoester       | 1.74     | 0.2      | 4.04     | 0.29       | 0.63       | 0.08       | 0.96                 | 1.01     | 8.09       | 83                                        | 957                                          |
| Cyanoester + PUT | 1.10     | 4.69     | 0.16     | 0.09       | 0.01       | 0.9        | 0.28                 | 0.98     | 1.03       | 36                                        | 3534                                         |
| Cyanoacid        | 0.49     | 1.55     | 3.31     | 0.35       | 0.53       | 0.11       | 1.37                 | 1.04     | 13.44      | 98                                        | 631                                          |
| Cyanoacid + EDA  | 0.91     | 2.54     | 4.18     | 0.22       | 0.64       | 0.13       | 2.40                 | 1.01     | 5.15       | 21                                        | 395                                          |

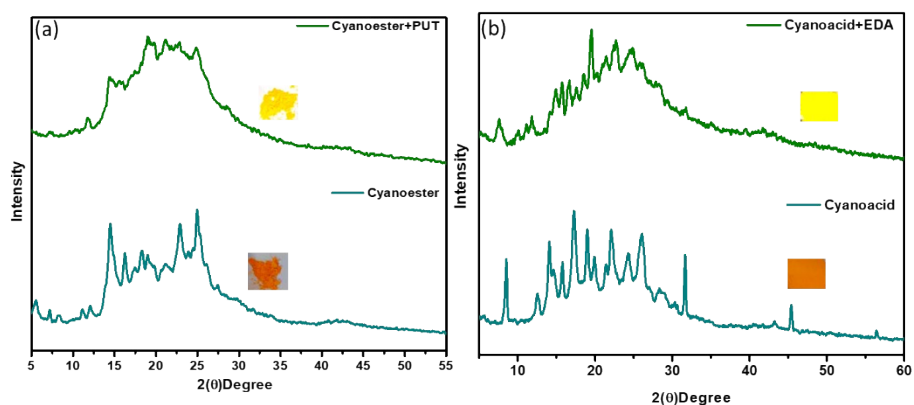

**Figure S16:** PXRD pattern of (a) **CYE** and fumed **CYE** with PUT (b) **CYA** and fumed **CYA** with EDA

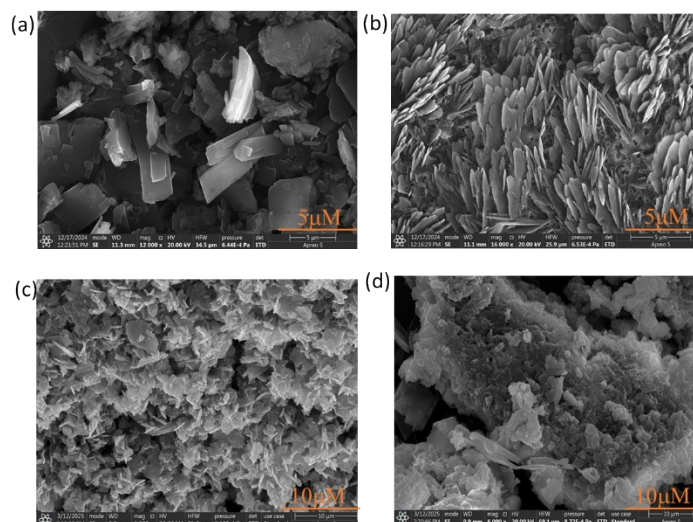

**Figure S17:** SEM images of (a) **CYE** (b) fumed **CYE** with PUT (c) **CYA** and (d) fumed **CYA** with EDA

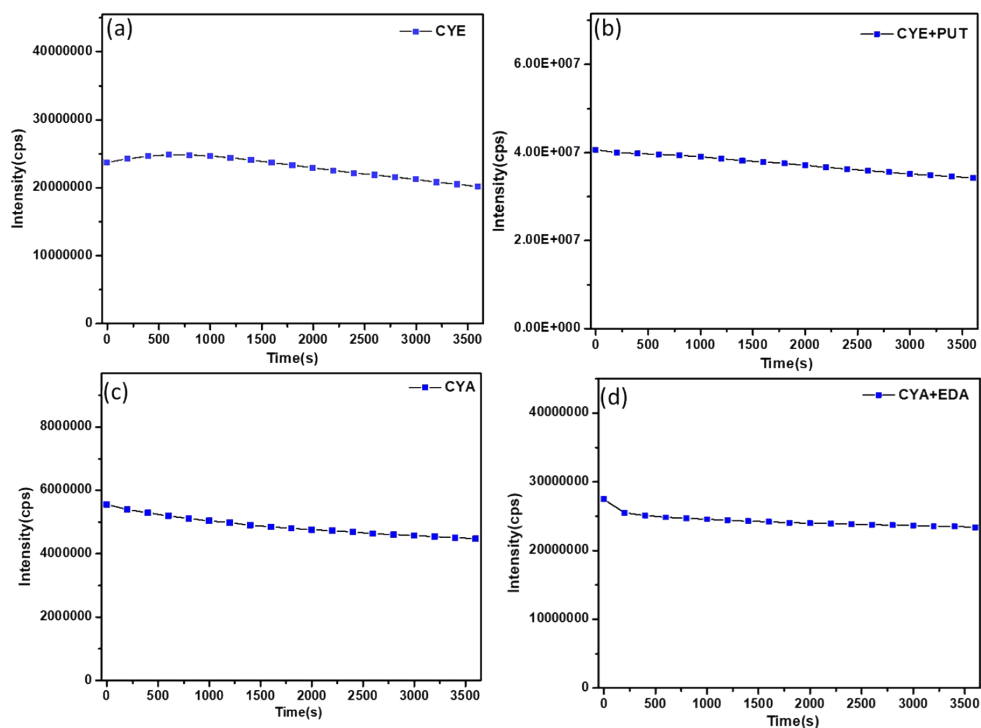

**Figure S18:** Photostability study of (a) CYE (b) CYE with PUT (c) CYA (d) CYA with EDA

Table S5 (a) Calculated lowest energy absorption (nm) and corresponding orbital contribution.

| Molecules              | Exp. | Calc.  | $f$    | Orbital contribution      | %                 |
|------------------------|------|--------|--------|---------------------------|-------------------|
| Cyanoester             | 470  | 402.41 | 1.0985 | H→L,<br>H→L+1             | 65.3, 25          |
| Cyano-monoamide adduct | 431  | 391.13 | 1.0571 | H→L,<br>H→L+1             | 65, 27.2          |
| Cyano-diamide adduct   | 431  | 398.84 | 1.6049 | H→L+1,<br>H-1→L,<br>H→L+3 | 37, 26.4,<br>15.2 |

Table S5 (b) Calculated fluorescence emission (nm) and corresponding orbital contribution

| Molecules              | Exp.    | Calc.  | $f$    | Orbital contribution | %    |
|------------------------|---------|--------|--------|----------------------|------|
| Cyanoester             | 596     | 615.85 | 1.4326 | H→L                  | 94.7 |
| Cyano-monoamide adduct | 557     | 604.65 | 1.3778 | H→L                  | 95.7 |
| Cyano-                 | 532-517 | 609.37 | 1.4122 | H→L                  | 95.2 |

|                   |  |  |  |  |  |
|-------------------|--|--|--|--|--|
| diamide<br>adduct |  |  |  |  |  |
|-------------------|--|--|--|--|--|

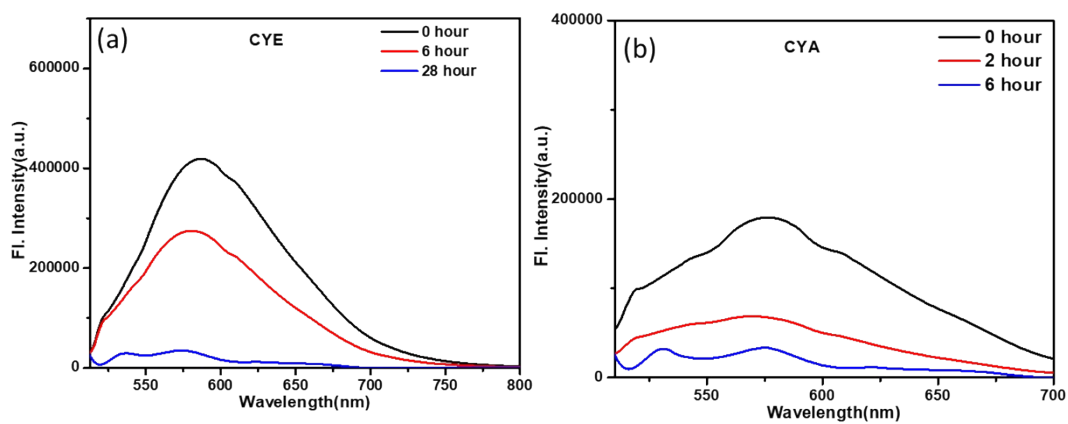

**Figure S19:** Emission spectra of (a) CYE (b) CYA after exposing to cottage-cheese at different time intervals.

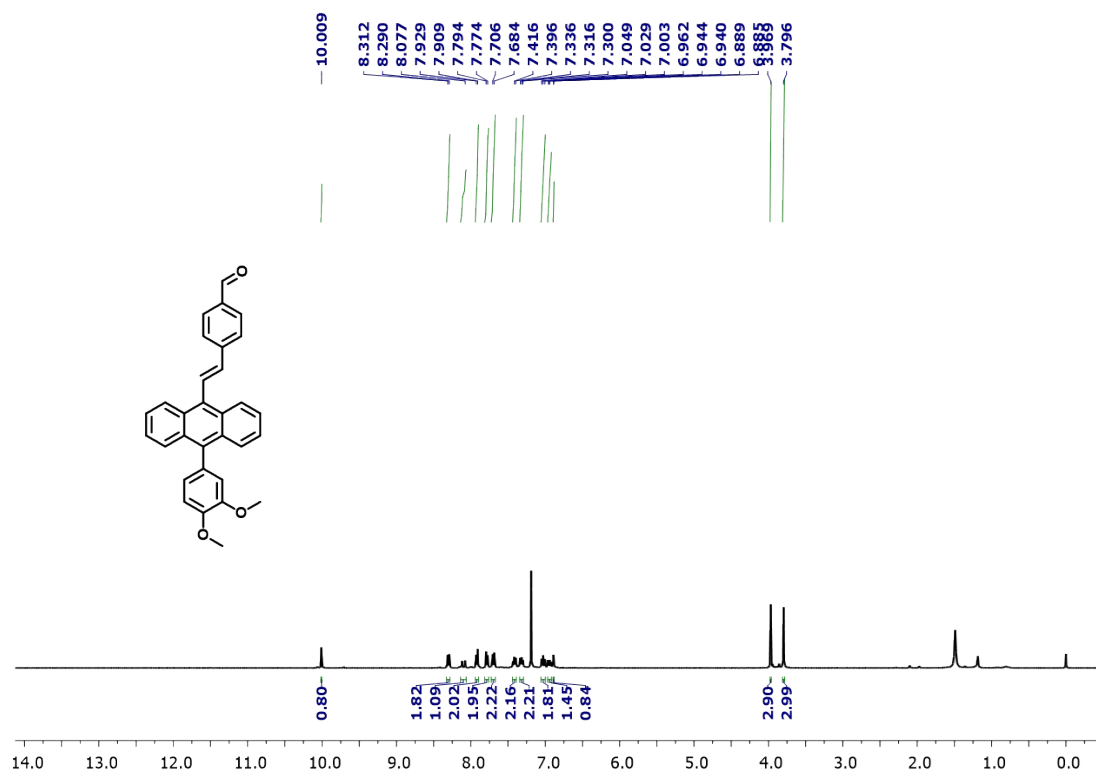

Figure S20: <sup>1</sup>H NMR (400 MHz) spectrum for DAA in CDCl<sub>3</sub>

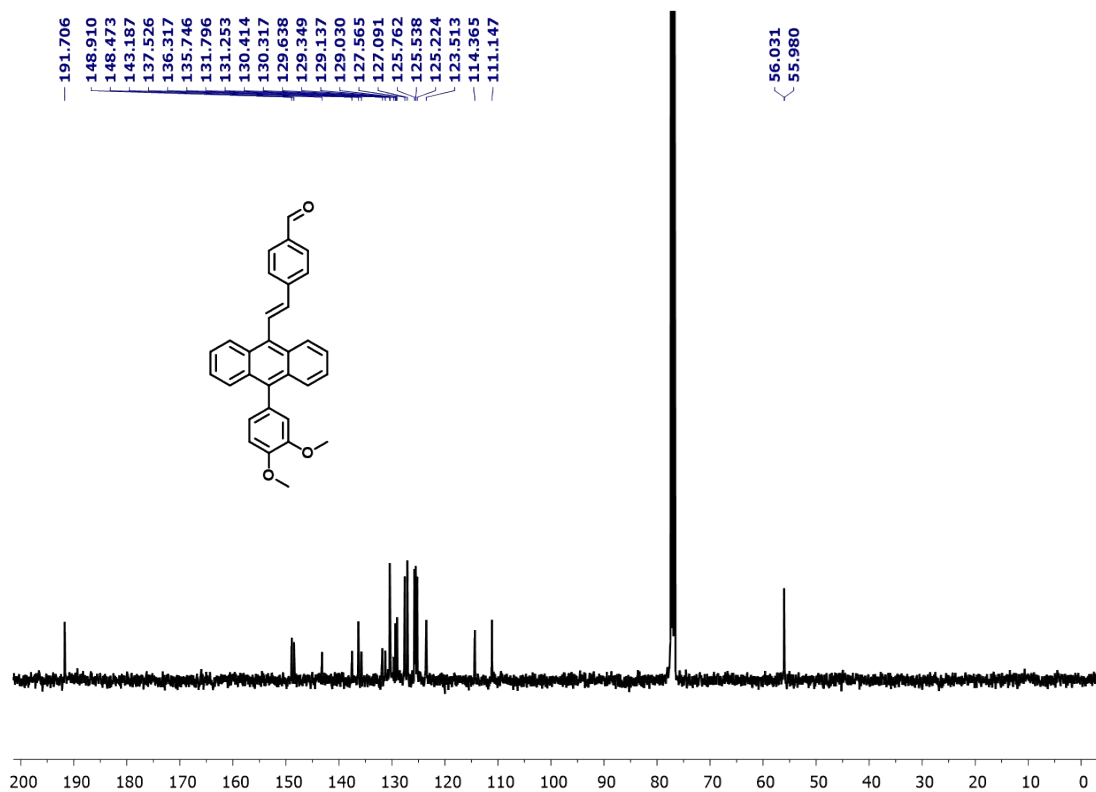

Figure S21: <sup>13</sup>C NMR (101 MHz) spectrum for DAA in CDCl<sub>3</sub>

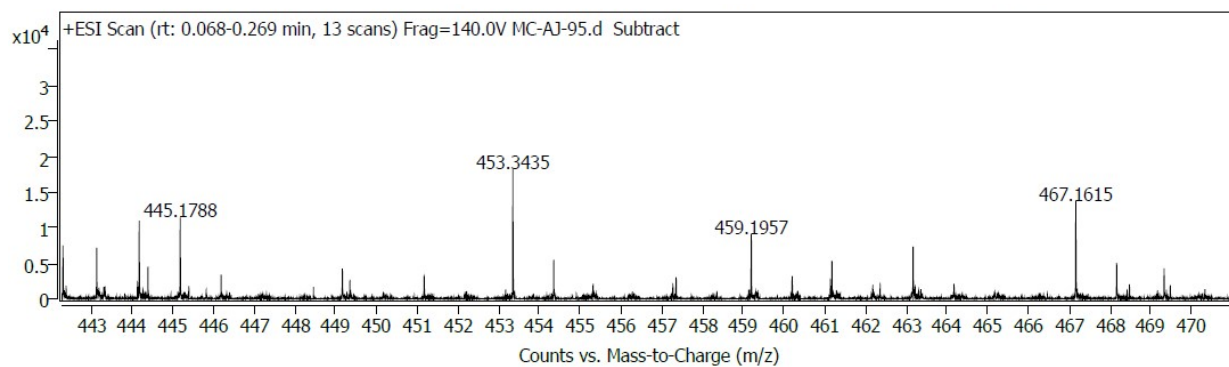

Figure S22: HRMS spectra for DAA

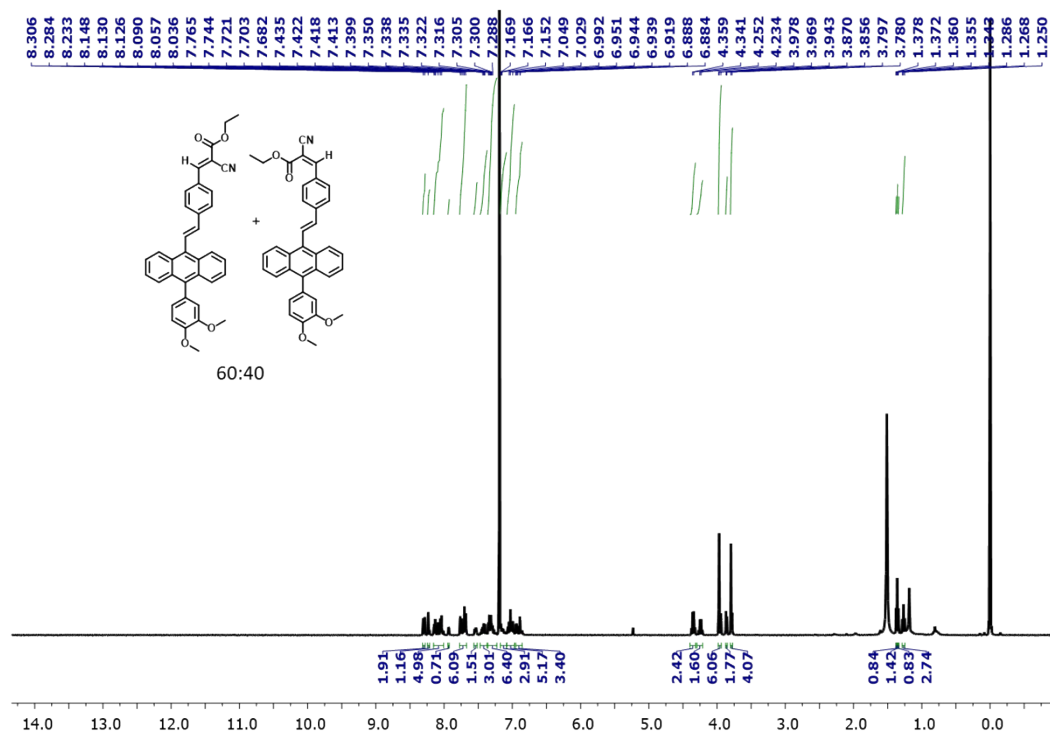

Figure S23: <sup>1</sup>H NMR (400 MHz) spectrum for CYE in CDCl<sub>3</sub>

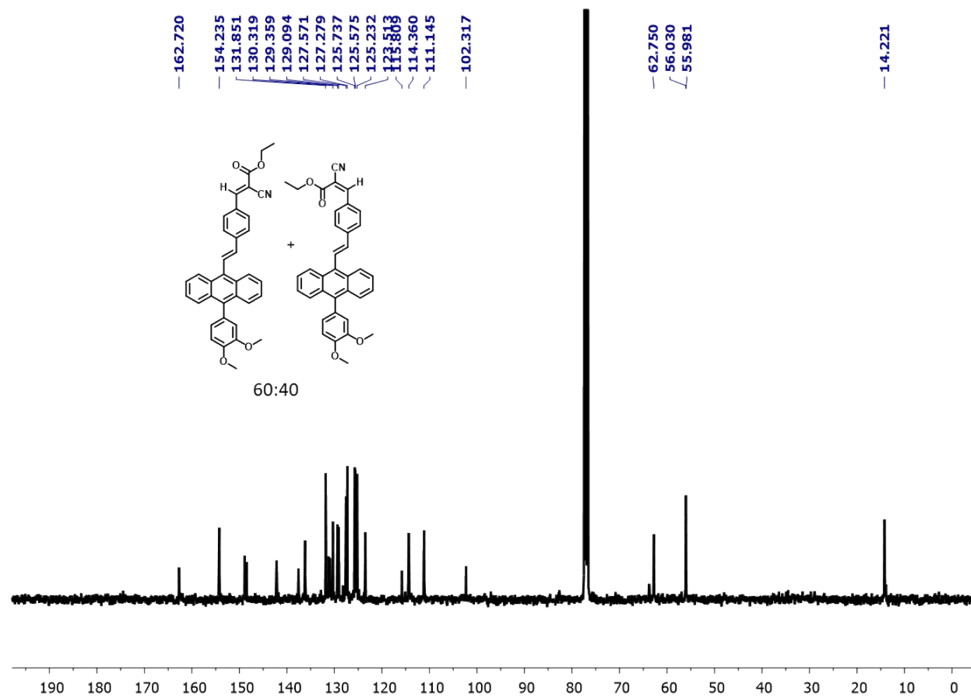

**Figure S24:**  $^{13}\text{C}$  NMR (101 MHz) spectrum for CYE in  $\text{CDCl}_3$

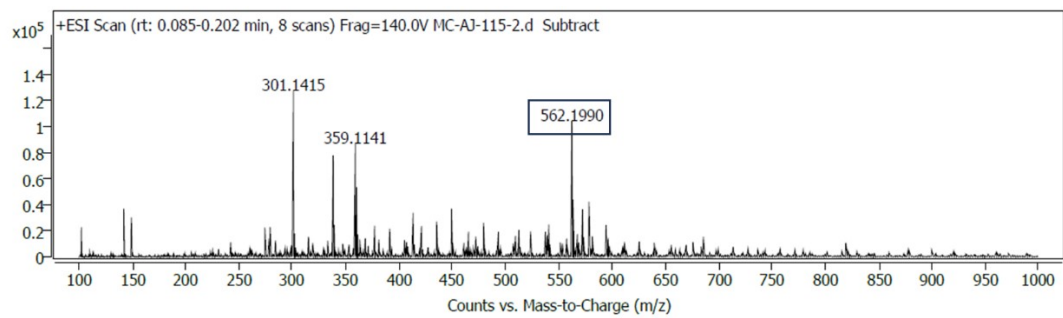

**Figure S25:** HRMS spectra of CYE

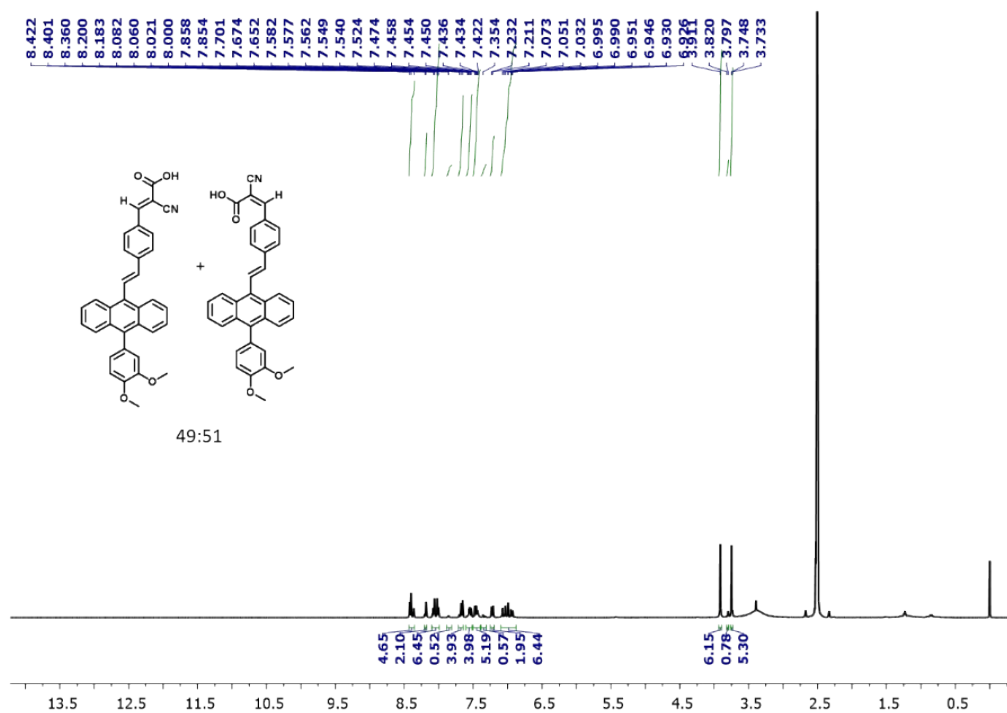

Figure S26:  $^1\text{H}$  NMR (400 MHz) spectrum for CYA in  $\text{DMSO-d}_6$

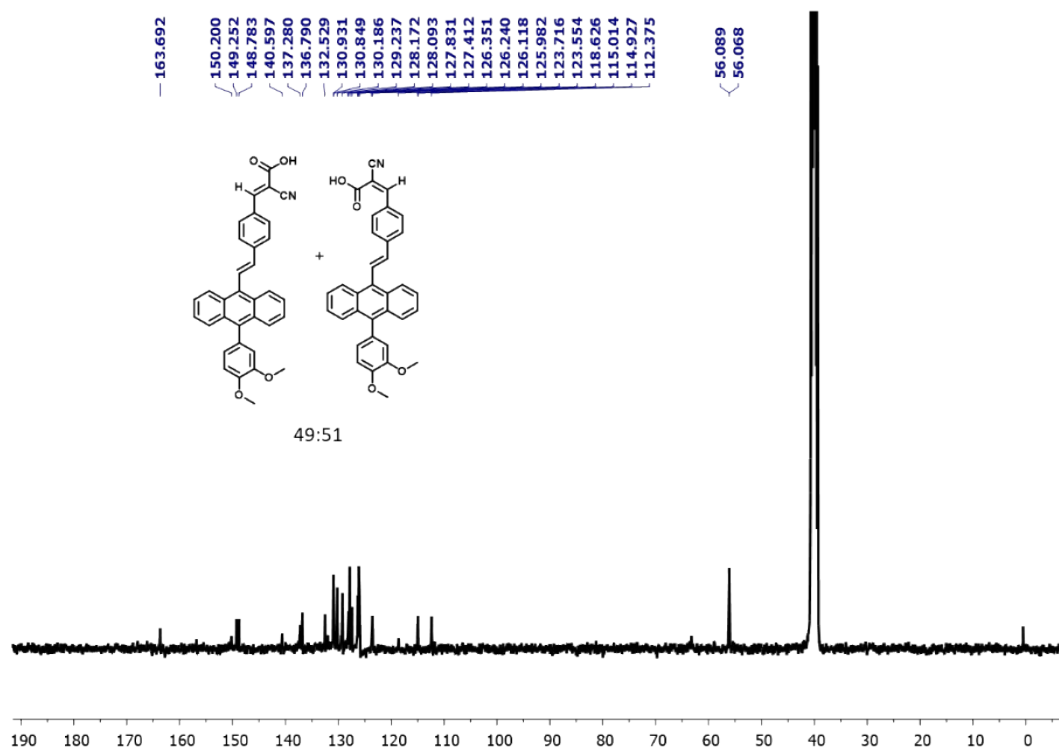

Figure S27:  $^{13}\text{C}$  NMR (101 MHz) spectrum for CYA in  $\text{DMSO-d}_6$

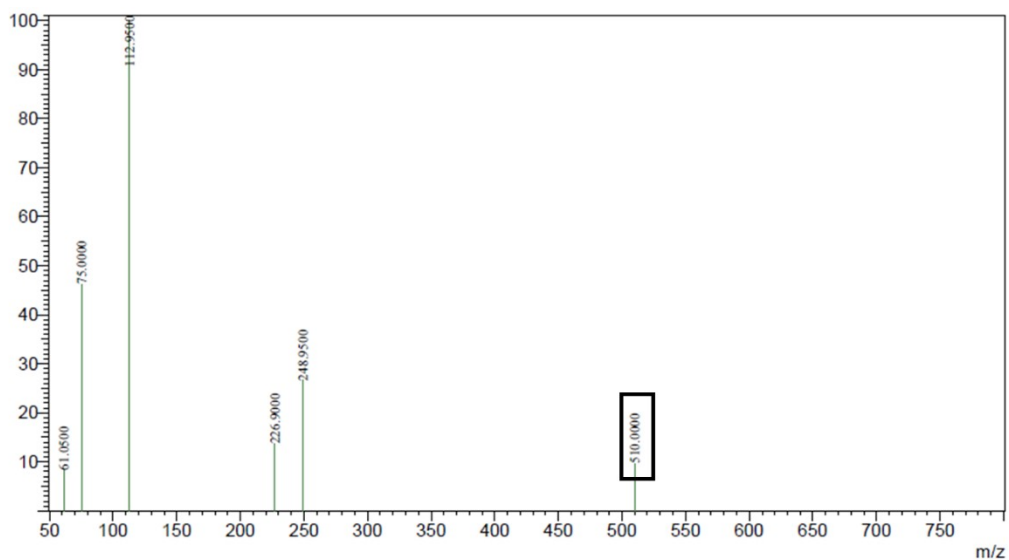

**Figure S28:** LCMS spectra of CYA

END

---
